# Supplementary material for: Waveguiding and SERS Simplified Raman Spectroscopy on Biological Samples
Source: MDPI journal article supplement (doi:10.3390/bios9010037), 2019-03-03
Supplement: s1 [file s1]

# Waveguiding and SERS Simplified Raman Spectroscopy on Biological Samples

Immanuel Valpapuram <sup>1</sup>, Patrizio Candeloro <sup>1</sup>, Maria Laura Coluccio <sup>1</sup>, Elvira Immacolata Parrotta <sup>1</sup>, Andrea Giugni <sup>2</sup>, Gobind Das <sup>2</sup>, Gianni Cuda <sup>1</sup>, Enzo Di Fabrizio <sup>2</sup>, Gerardo Perozziello <sup>1,\*</sup>

<sup>1</sup> Department of Experimental and Clinical Medicine, University “Magna Graecia” of Catanzaro, Catanzaro 88100, Italy; immanuelloyola@gmail.com (I.V.); patrizio.candeloro@unicz.it (P.C.); coluccio@unicz.it (M.L.C.); parrotta@unicz.it (E.I.P.); cuda@unicz.it (G.C.);

<sup>2</sup> Structural Molecular Imaging Light Enhanced Spectroscopies Laboratory, Physical Science and Engineering Division, King Abdullah University of Science and Technology, Thuwal 23955-6900, Saudi Arabia; andrea.giugni@kaust.edu.sa (A.G.); gobind.das@kaust.edu.sa (G.D.); enzo.difabrizio@kaust.edu.sa (E.D.F.)

\* Correspondence: gerardo.perozziello@unicz.it

## Raman Enhancement Factor

The enhancement factor ( $f$ ) (or better, the Raman signal enhancement) compared to spontaneous Raman spectroscopy is 40, calculated as the intensity ratio between the ATP molecule peaks at  $1401\text{cm}^{-1}$  (ring stretching vibration) of SERS device ( $I_{\text{SERS}}$ ) and spontaneous ( $I_{\text{Raman}}$ ):  $f = I_{\text{SERS}}/I_{\text{Raman}}$ . The Electric field amplification is  $f^{1/4}$ , as known from literature. For clarity's sake, the spontaneous Raman spectrum is not reported preferring to evidence the SERS spectra of the three probe molecules.

## Power Loss Estimation

A rough estimation of optical losses can be estimated about 95%, due to coupling and propagation loss, which is in agreement with other published literature data [36].

The power loss in the waveguide was calculated by comparing peak intensities of phenylalanine measured in the device prism + OWG + SERS surface with the ones obtained on the SERS surface coupled directly by a microscope objective. In particular, the peak used for the comparison was that at  $1606\text{cm}^{-1}$  (in-phase motion of C atoms of the phenyl ring), which together to the peak at  $1003\text{cm}^{-1}$  (ring breathing vibration), is the most representative for that molecule.
